# Supplementary material for: Kinetically controlled narcissistic self-sorting of Pd(ii)-linked self-assemblies from structurally similar tritopic ligands
Source: Royal Society of Chemistry journal article supplement (doi:10.1039/d2cc04496j), 2022-01-01
Supplement: d2cc04496j1.pdf [file d2cc04496j1.pdf]

## Supplementary Information

### *Kinetically controlled narcissistic self-sorting of Pd(II)-linked self-assemblies from structurally similar tritopic ligands*

Tsukasa Abe,<sup>1</sup> Shinnosuke Horiuchi<sup>1</sup> and Shuichi Hiraoka<sup>1,\*</sup>

<sup>1</sup>*Department of Basic Science, Graduate School of Arts and Sciences, The University of Tokyo,  
3-8-1 Komaba, Meguro-ku, Tokyo 153-8902, Japan.*

*\*E-mail: hiraoka-s@g.ecc.u-tokyo.ac.jp*

|                                                                                                                                                                                                      |    |
|------------------------------------------------------------------------------------------------------------------------------------------------------------------------------------------------------|----|
| • General Information .....                                                                                                                                                                          | 2  |
| • Materials .....                                                                                                                                                                                    | 2  |
| • Preparation of [ <b>PdPy</b> * <sub>2</sub> ](PF <sub>6</sub> ) <sub>2</sub> .....                                                                                                                 | 2  |
| • X-ray analysis of the [ <b>Pd</b> <sub>3</sub> <b>1</b> <sub>2</sub> ] <sup>6+</sup> cage and (BF <sub>4</sub> <sup>-</sup> )⊂[ <b>Pd</b> <sub>2</sub> <b>1</b> <sub>2</sub> ] <sup>4+</sup> ..... | 2  |
| • General procedure for the self-sorting experiments .....                                                                                                                                           | 4  |
| • Characterization of the [ <b>Pd</b> <sub>3</sub> <b>1</b> <sub>2</sub> ] <sup>6+</sup> cage .....                                                                                                  | 5  |
| • Characterization of (BF <sub>4</sub> <sup>-</sup> )⊂[ <b>Pd</b> <sub>2</sub> <b>1</b> <sub>2</sub> ] <sup>4+</sup> .....                                                                           | 9  |
| • Determination of the equilibrium constants between NO <sub>3</sub> <sup>-</sup> and the [ <b>Pd</b> <sub>3</sub> <b>1</b> <sub>2</sub> ] <sup>6+</sup> cage .....                                  | 13 |
| • Characterization of the [ <b>Pd</b> <sub>3</sub> <b>2</b> <sub>2</sub> ] <sup>6+</sup> cage .....                                                                                                  | 14 |
| • Assignment of the <sup>1</sup> H NMR spectra of (X <sup>-</sup> )⊂[ <b>Pd</b> <sub>2</sub> <b>2</b> <sub>2</sub> ] <sup>4+</sup> .....                                                             | 16 |
| • <sup>1</sup> H NMR spectra of the self-sorting experiments .....                                                                                                                                   | 17 |
| • References .....                                                                                                                                                                                   | 19 |

## General Information

$^1\text{H}$ ,  $^{13}\text{C}$ ,  $^{19}\text{F}$  NMR spectra were recorded using a Bruker AV-500 (500 MHz) spectrometer. All  $^1\text{H}$  NMR spectra were referenced using a residual solvent peak,  $\text{CD}_3\text{NO}_2$  ( $\delta$  4.33). Electrospray ionization time-of-flight (ESI-TOF) mass spectra were obtained using a Waters Xevo G2-S ToF mass spectrometer.

## Materials

Unless otherwise noted, all solvents and reagents were obtained from commercial suppliers (TCI Co., Ltd., WAKO Pure Chemical Industries Ltd., KANTO Chemical Co., Inc., and Sigma-Aldrich Co.) and were used as received.  $\text{CD}_3\text{NO}_2$  was purchased from Acros Organics and used after dehydration with Molecular Sieves 4Å. Tritopic ligands **1** and **2** and  $[\text{Pd}(\text{CH}_3\text{CN})_2](\text{PF}_6)_2$  were prepared according to the literature.<sup>1-3</sup>

## Preparation of $[\text{PdPy}^*_2](\text{PF}_6)_2$

A solution of  $\text{Py}^*$  ( $\text{Py}^*$ : 3-chloropyridine) (62.5 mg, 0.55 mmol),  $\text{PdCl}_2^4$  ( $\text{Pd}$  indicates  $\text{Pd}(\text{TMEDA})$ ) (73.5 mg, 0.25 mmol), and  $\text{AgPF}_6$  (139 mg, 0.55 mmol) in anhydrous  $\text{CH}_3\text{NO}_2$  (3 mL) was stirred at 70 °C for 3 h under nitrogen atmosphere. The obtained solution was filtered and concentrated in vacuo. The obtained solid was washed with water (1.0 mL) with a centrifugation several times to afford  $[\text{PdPy}^*_2](\text{PF}_6)_2$  as pale yellow solid in 63% yield.  $^1\text{H}$  NMR (500 MHz,  $\text{CD}_3\text{NO}_2$ ):  $\delta$  9.05 (d,  $J$  = 2.0 Hz, 2H), 8.98 (d,  $J$  = 5.0 Hz, 2H), 8.07 (ddd,  $J$  = 8.0, 1.5, 1.0 Hz, 2H), 7.67 (dd,  $J$  = 9.5, 5.5 Hz, 2H), 3.18 (s, 4H), 2.73 (s, 12H).  $^{13}\text{C}$  NMR (125 MHz,  $\text{CD}_3\text{NO}_2$ ):  $\delta$  152.5, 150.7, 142.7, 136.9, 130.0, 64.5, 51.8. ESI-TOF-MS (positive  $m/z$ ):  $[\text{Pd}(\text{TMEDA})\text{Py}^*_2]^{2+}$  calcd. for  $\text{C}_{16}\text{H}_{24}\text{Cl}_2\text{N}_4\text{Pd}$ , 225.02; found, 225.01.

## X-ray analysis of the $[\text{Pd}_3\mathbf{1}_2]^{6+}$ cage and $(\text{BF}_4)^-\subset[\text{Pd}_2\mathbf{1}_2]^{4+}$

The single crystals were immersed in and coated with Paratone N oil (Hampton Research Corp.) and mounted on a MicroMount<sup>TM</sup> (MiteGen LLC). Diffraction data of the single crystal were collected on a SuperNova single-crystal X-ray diffractometer with an Eos CCD detector (Rigaku Oxford Diffraction) at 180 K, using  $\text{Cu K}\alpha$  ( $\lambda$  = 1.54184 Å) radiation monochromated by multilayer mirror optics. Bragg spots were integrated using the CrysAlisPro program package (Rigaku Oxford Diffraction). An empirical absorption correction based on the multi-scan method using spherical harmonics was implemented in the SCALE3 ABSPACK scaling algorithm. The structure was solved by an intrinsic phasing method on the SHELXT program<sup>5</sup> and refined by a full-matrix least-squares minimization on F2 executed by the SHELXL program<sup>6</sup> using the Olex2 software package (OlexSys Ltd)<sup>7</sup> and the ShelXle graphical user interface.<sup>8</sup> The data were corrected for scattered electron density in the large solvent void by using the PLATON SQUEEZE method.<sup>9</sup> Thermal displacement parameters were refined anisotropically for all non-hydrogen atoms. All the hydrogen atoms were located at calculated positions and the parameters were refined with a riding model. The crystal structures are shown in Figure 3. Crystallographic data are summarized in Table S1. The data were deposited in the CSD as CCDC Deposition 2191966 for  $(\text{BF}_4)^-\subset[\text{Pd}_2\mathbf{1}_2](\text{BF}_4)_3$  and 2191967 for  $[\text{Pd}_3\mathbf{1}_2](\text{PF}_6)_6$ , respectively.

**Table S1.** X-ray crystallographic data for the [*Pd*<sub>3</sub>**1**<sub>2</sub>]<sup>6+</sup> cage and (BF<sub>4</sub><sup>−</sup>)⊂[*Pd*<sub>2</sub>**1**<sub>2</sub>]<sup>4+</sup>.

| Compound                                                                                  | The [ <i>Pd</i> <sub>3</sub> <b>1</b> <sub>2</sub> ] <sup>6+</sup> cage                        | (BF <sub>4</sub> <sup>−</sup> )⊂[ <i>Pd</i> <sub>2</sub> <b>1</b> <sub>2</sub> ] <sup>4+</sup>                        |
|-------------------------------------------------------------------------------------------|------------------------------------------------------------------------------------------------|-----------------------------------------------------------------------------------------------------------------------|
| Formula                                                                                   | C <sub>60</sub> H <sub>78</sub> F <sub>41</sub> N <sub>12</sub> P <sub>7</sub> Pd <sub>3</sub> | C <sub>56.5</sub> H <sub>69.5</sub> B <sub>3.5</sub> F <sub>14</sub> N <sub>12.5</sub> O <sub>5</sub> Pd <sub>2</sub> |
| Formula weight                                                                            | 2282.33                                                                                        | 1520.38                                                                                                               |
| Habit                                                                                     | colorless                                                                                      | colorless                                                                                                             |
| Crystal size /mm                                                                          | 0.20 × 0.20 × 0.05                                                                             | 0.50 × 0.30 × 0.10                                                                                                    |
| <i>T</i> /K                                                                               | 180                                                                                            | 140                                                                                                                   |
| Crystal system                                                                            | hexagonal                                                                                      | triclinic                                                                                                             |
| Space group                                                                               | <i>P</i> -62c                                                                                  | <i>P</i> -1                                                                                                           |
| <i>a</i> /Å                                                                               | 16.6805(5)                                                                                     | 12.3891(4)                                                                                                            |
| <i>b</i> /Å                                                                               | 16.6805(5)                                                                                     | 14.7381(5)                                                                                                            |
| <i>c</i> /Å                                                                               | 24.1520(13)                                                                                    | 21.5181(7)                                                                                                            |
| <i>α</i> /°                                                                               | 90                                                                                             | 98.368(3)                                                                                                             |
| <i>β</i> /°                                                                               | 90                                                                                             | 91.608(3)                                                                                                             |
| <i>γ</i> /°                                                                               | 120                                                                                            | 110.971(3)                                                                                                            |
| <i>V</i> /Å <sup>3</sup>                                                                  | 5819.7(5)                                                                                      | 3616.0(2)                                                                                                             |
| <i>Z</i>                                                                                  | 2                                                                                              | 2                                                                                                                     |
| <i>d</i> <sub>calc</sub> /g · cm <sup>−3</sup>                                            | 1.302                                                                                          | 1.396                                                                                                                 |
| <i>F</i> (000)                                                                            | 2268                                                                                           | 1543                                                                                                                  |
| <i>μ</i> (Cu <i>Kα</i> )/mm <sup>−1</sup>                                                 | 5.523                                                                                          | 4.775                                                                                                                 |
| GOF                                                                                       | 1.036                                                                                          | 1.035                                                                                                                 |
| No. of reflns                                                                             | 13799                                                                                          | 28962                                                                                                                 |
| Unique data                                                                               | 3643                                                                                           | 13338                                                                                                                 |
| <i>R</i> <sub>int</sub>                                                                   | 0.0509                                                                                         | 0.0358                                                                                                                |
| <i>R</i> <sub>1</sub> <sup>a</sup> ( <i>F</i> <sup>2</sup> > 2σ( <i>F</i> <sup>2</sup> )) | 0.0830                                                                                         | 0.0490                                                                                                                |
| <i>wR</i> <sub>2</sub> <sup>b</sup> (all data)                                            | 0.2556                                                                                         | 0.1420                                                                                                                |

<sup>a</sup>  $R_1 = \Sigma ||F_o| - |F_c|| / \Sigma |F_o|$ .

<sup>b</sup>  $wR_2 = \{\Sigma w(F_o^2 - F_c^2)^2 / \Sigma (F_o^2)^2\}^{1/2}$ .

## General procedure for the self-sorting experiments

A 2.4 mM solution of [2.2]paracyclophane in  $\text{CHCl}_3$  (125  $\mu\text{L}$ ), which was used as an internal standard, was added to two NMR tubes (tubes **I** and **II**) and the solvent was removed in vacuo. A solution of [ $\text{PdPy}^*_2$ ]( $\text{PF}_6$ )<sub>2</sub> or [ $\text{Pd}(\text{CH}_3\text{CN})_2$ ]( $\text{PF}_6$ )<sub>2</sub> solution in  $\text{CD}_3\text{NO}_2$  was prepared as solution **A** (10 mM (for [ $\text{Pd}$ ]<sub>0</sub> = 1.7 mM). Solution **A** (60  $\mu\text{L}$ ),  $\text{CDCl}_3$  (50  $\mu\text{L}$ ),  $\text{CD}_3\text{NO}_2$  (490  $\mu\text{L}$ ) were added to tube **I**. The exact concentration of [ $\text{PdPy}^*_2$ ]( $\text{PF}_6$ )<sub>2</sub> or [ $\text{Pd}(\text{CH}_3\text{CN})_2$ ]( $\text{PF}_6$ )<sub>2</sub> in solution **A** was determined through the comparison of the signal integral with [2.2]paracyclophane by  $^1\text{H}$  NMR. Solution of tritopic ligands **1** and **2** (10 mM (for [**1**]<sub>0</sub> = [**2**]<sub>0</sub> = 0.67 mM) in  $\text{CHCl}_3$  (40 mL) were added to tube **II** and the solvent was removed in vacuo. Then,  $\text{CDCl}_3$  (50  $\mu\text{L}$ ) and  $\text{CD}_3\text{NO}_2$  (450  $\mu\text{L}$ ) was added to tube **II** and the exact amount of **1** in tube **II** was determined through the comparison of the signal integral with [2.2]paracyclophane by  $^1\text{H}$  NMR. 1.25 eq. (against the total amounts of ligands **1** and **2** in tube **II**) of solution **A** (*ca.* 100  $\mu\text{L}$ ; the exact amount was determined based on the exact concentrations of solution **A** and of **1** in tube **II**) was added to tube **II**. Then, *n*- $\text{Bu}_4\text{N}^+\cdot\text{NO}_3^-$  in  $\text{CD}_3\text{NO}_2$  (20 mM, 30  $\mu\text{L}$ ) was added to tube **II**. After convergence monitored by  $^1\text{H}$  NMR, the existence ratios of ( $\text{NO}_3^-$ ) $\subset$ [ $\text{Pd}_3\mathbf{1}_2$ ]<sup>6+</sup>, ( $\text{NO}_3^-$ ) $\subset$ [ $\text{Pd}_2\mathbf{2}_2$ ]<sup>4+</sup> and ( $\text{NO}_3^-$ ) $\subset$ [ $\text{Pd}_2\mathbf{1}\cdot\mathbf{2}$ ]<sup>4+</sup> based on **1** and **2** were quantified by the integral value of each  $^1\text{H}$  NMR signal against the signal of the internal standard ([2.2]paracyclophane). The existence ratios indicate the distribution of the two tritopic ligands in the assemblies. Thus, when the self-assembly takes place in a purely statistic manner (nonselective), the existence ratios of ( $\text{NO}_3^-$ ) $\subset$ [ $\text{Pd}_3\mathbf{1}_2$ ]<sup>6+</sup>, ( $\text{NO}_3^-$ ) $\subset$ [ $\text{Pd}_2\mathbf{2}_2$ ]<sup>4+</sup> and ( $\text{NO}_3^-$ ) $\subset$ [ $\text{Pd}_2\mathbf{1}\cdot\mathbf{2}$ ]<sup>4+</sup> should be 50, 50 and 50%, respectively, where the ratio of the numbers of the assemblies is 1:1:2.

Characterization of the  $[Pd_31_2]^{6+}$  cage

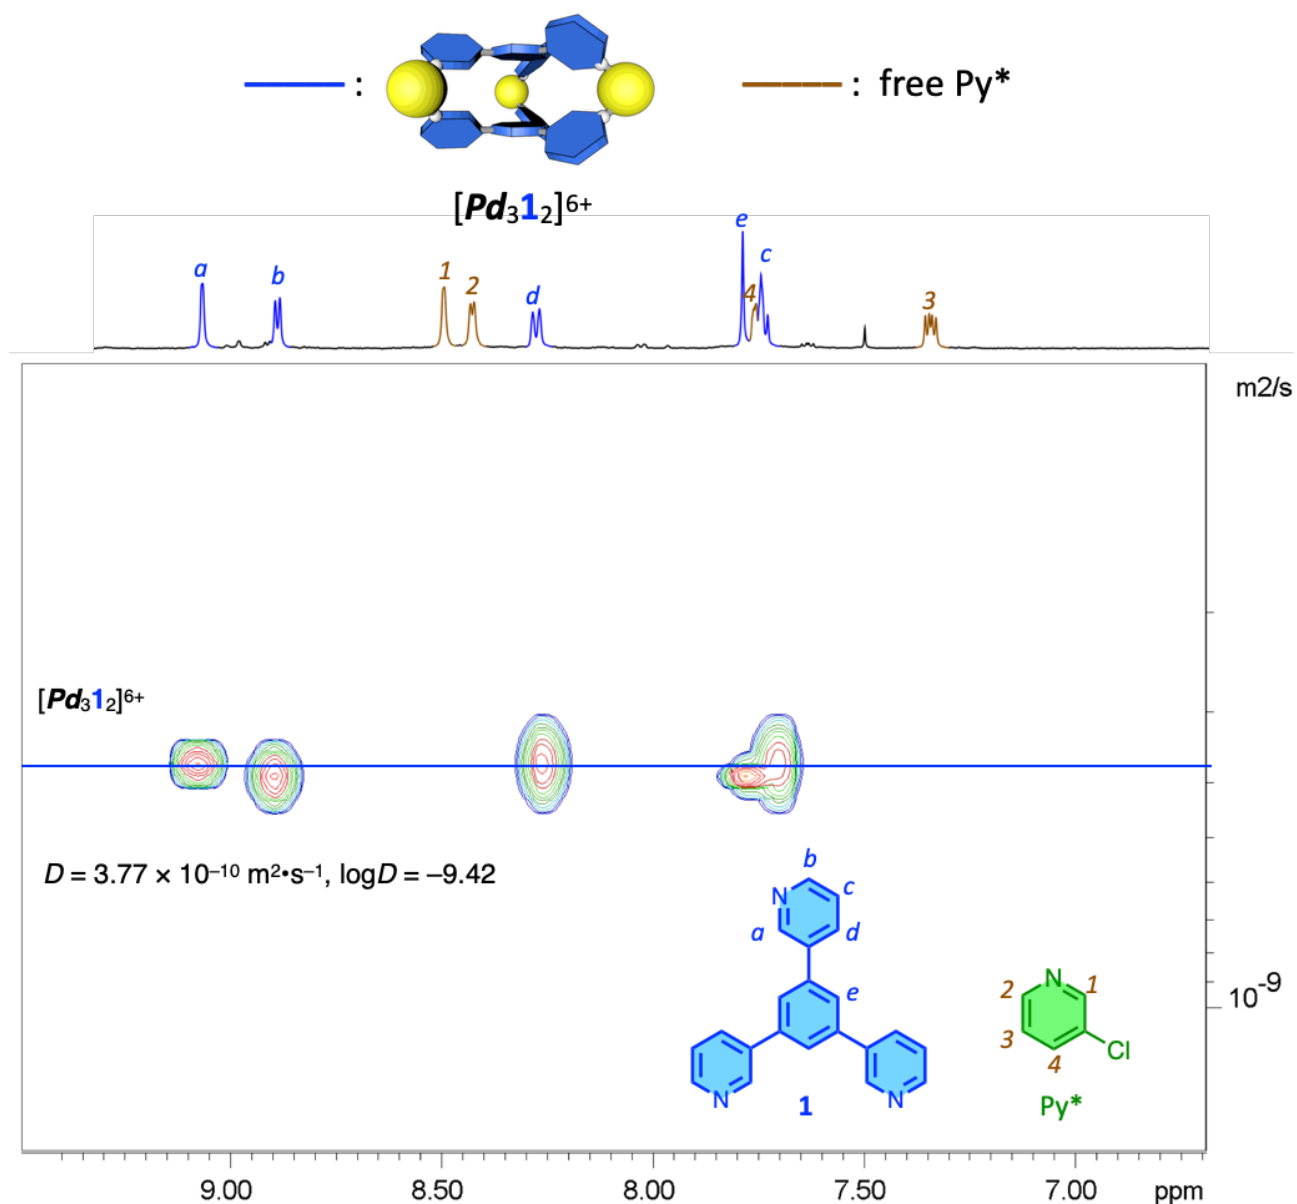

**Figure S1.**  $^1H$  DOSY NMR spectrum (500 MHz,  $CD_3NO_2$ , 298 K, aromatic region) of the reaction mixture for the self-assembly of the  $[Pd_31_2](PF_6)_6$  cage from  $[PdPy^*_2](PF_6)_2$  and **1** ( $[Pd]_0 = 1.0$  mM and  $[1]_0 = 0.67$  mM) in  $CD_3NO_2$  at 298 K measured after convergence. The signals colored blue and brown indicate  $[Pd_31_2]^{6+}$  and  $Py^*$ , respectively.

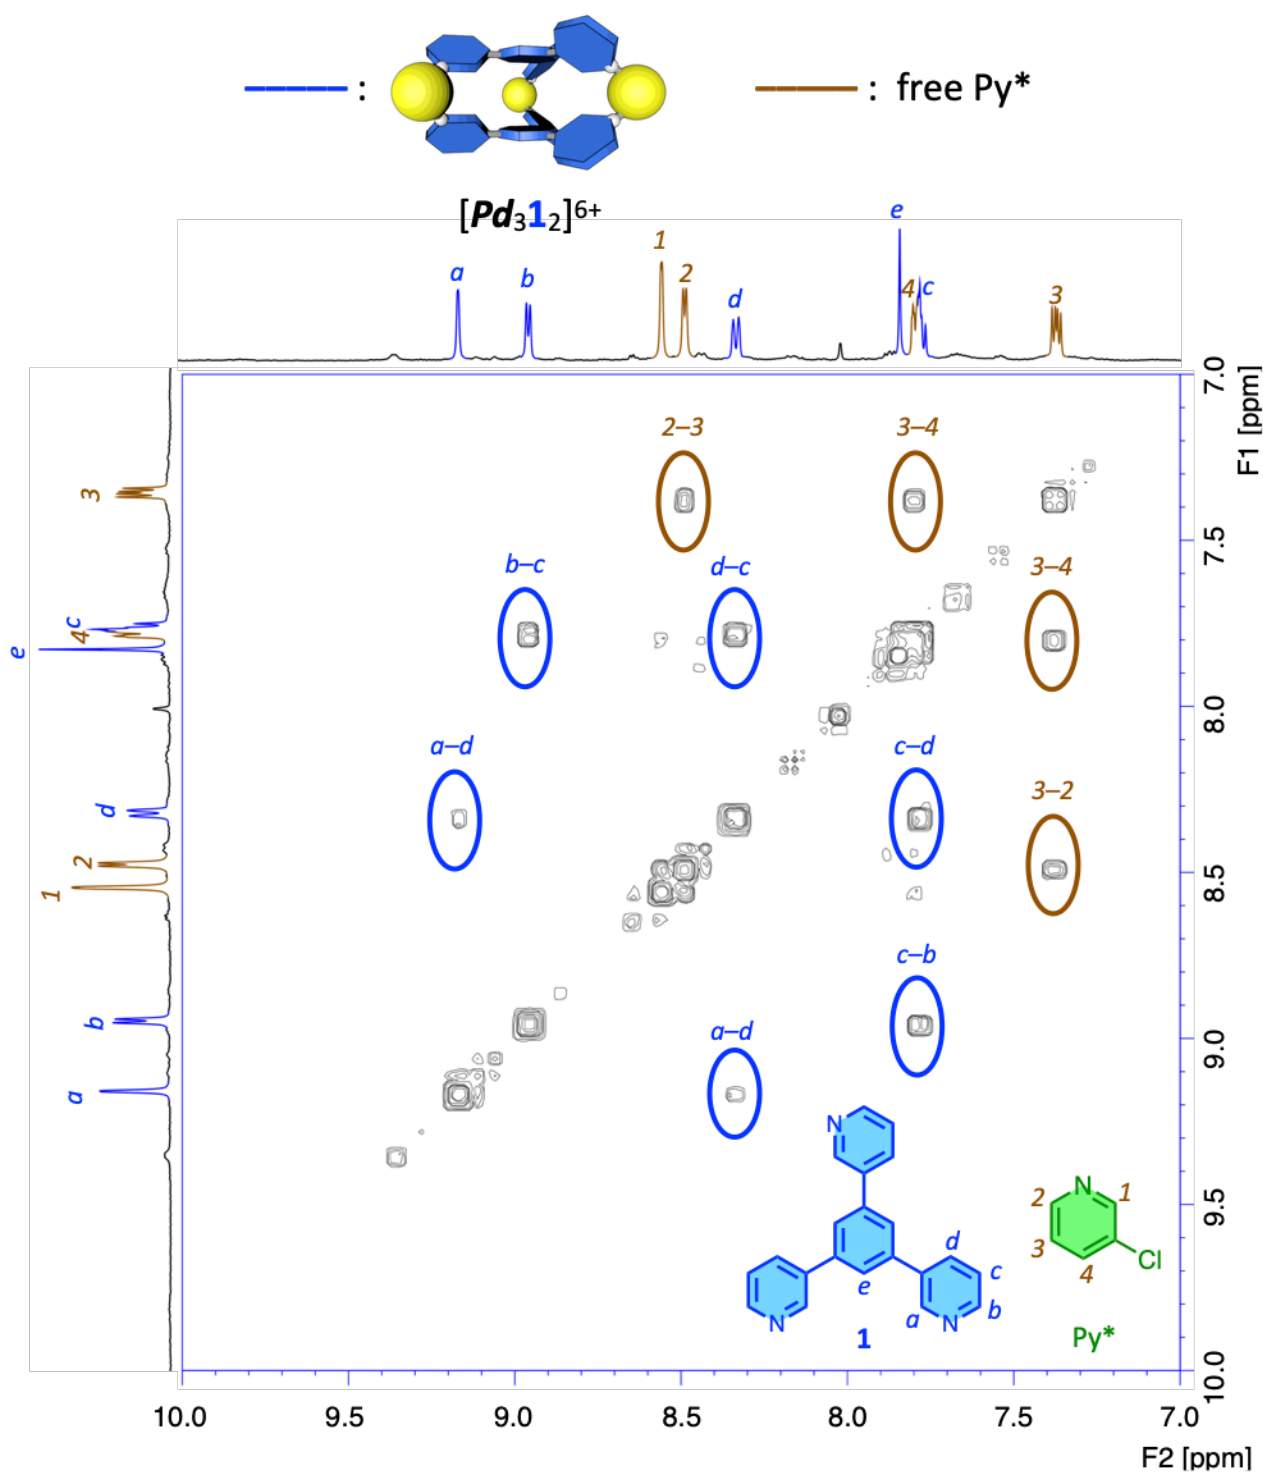

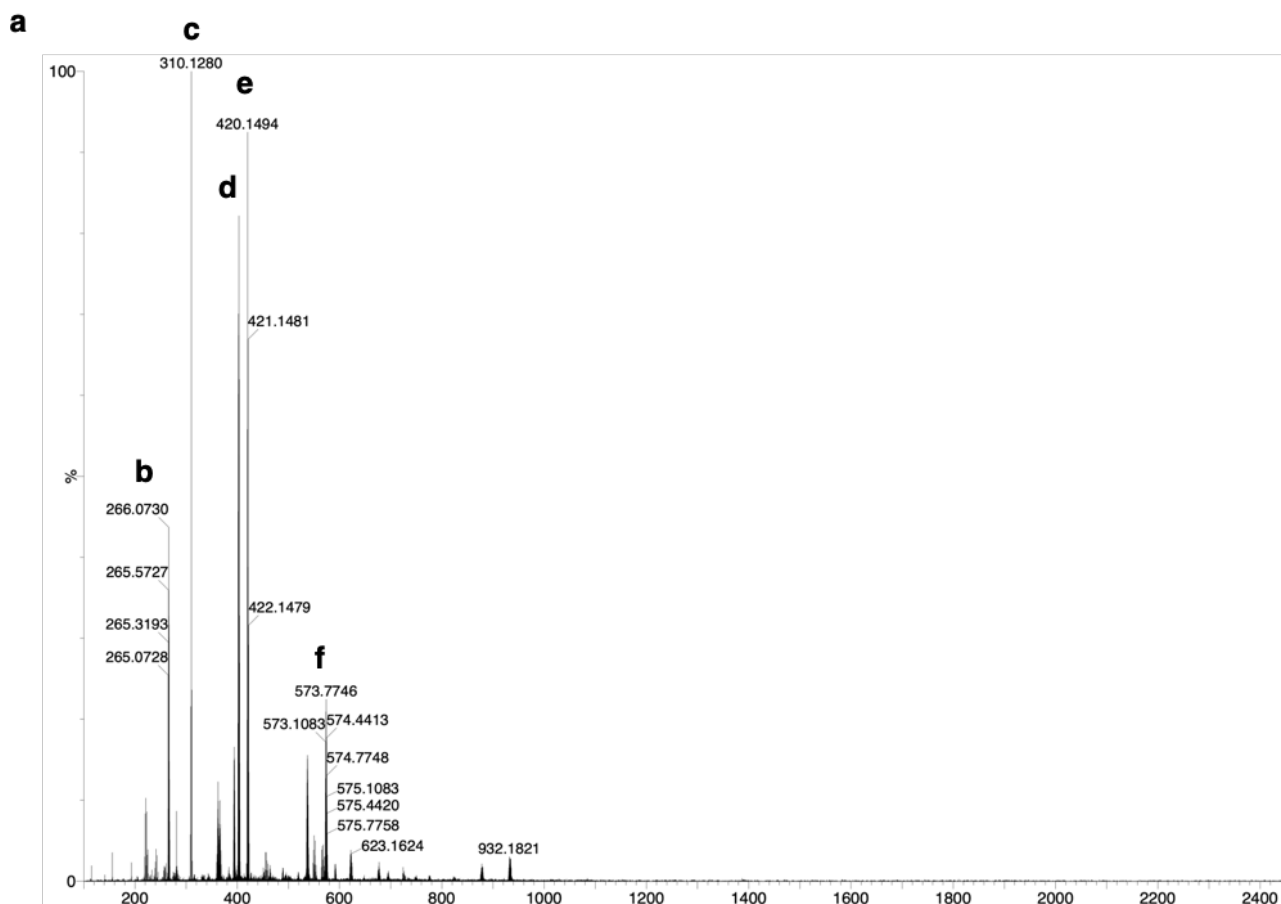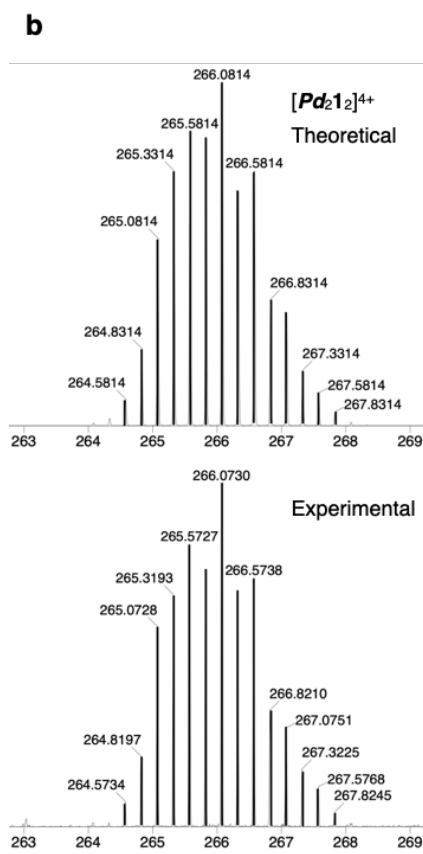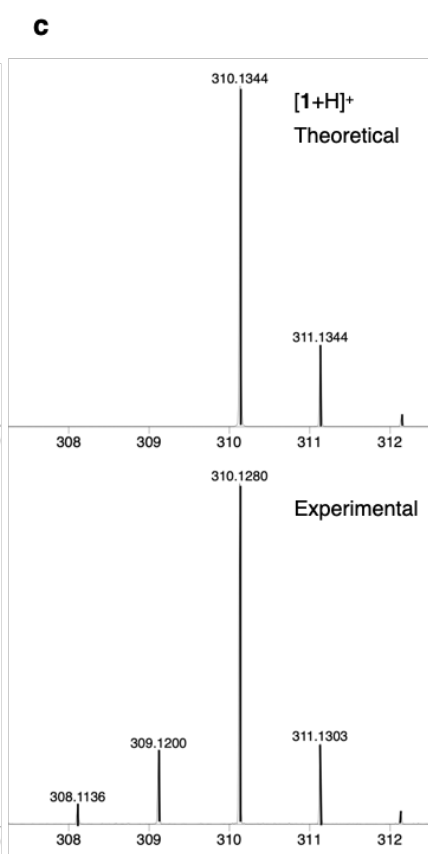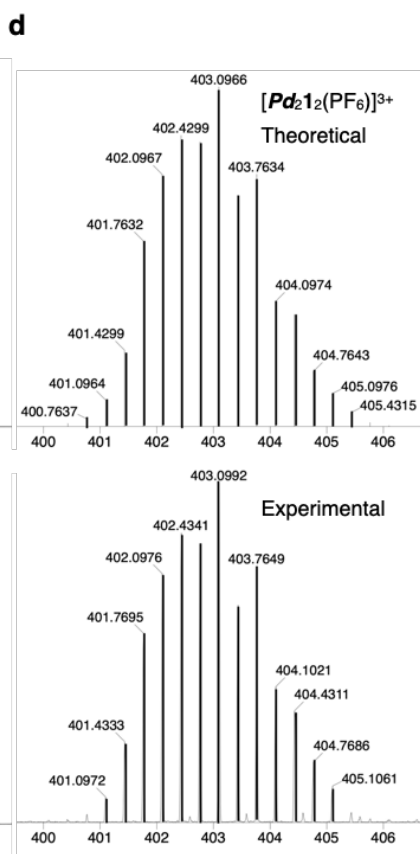

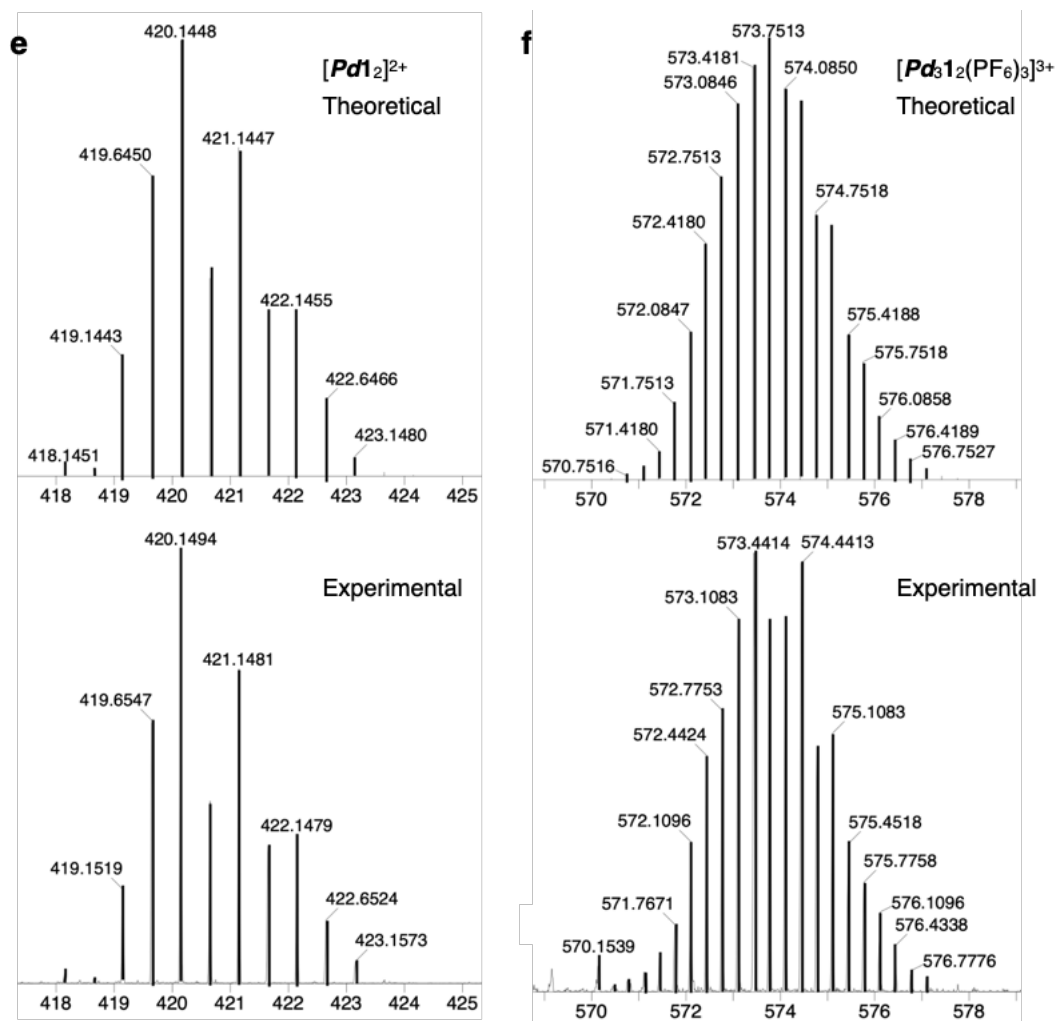

**Figure S3.** ESI-TOF mass spectrum of the reaction mixture for the self-assembly of the  $[Pd_{312}]^{6+}$  cage from  $[PdPy^*_2](BF_4)_2$  and **1** in  $CD_3NO_2$  at 298 K measured after convergence. (a): overall spectrum, (b)–(f): expanded spectra.



# Characterization of $(\text{BF}_4^-)\text{C}[\text{Pd}_2\mathbf{1}_2]^{4+}$

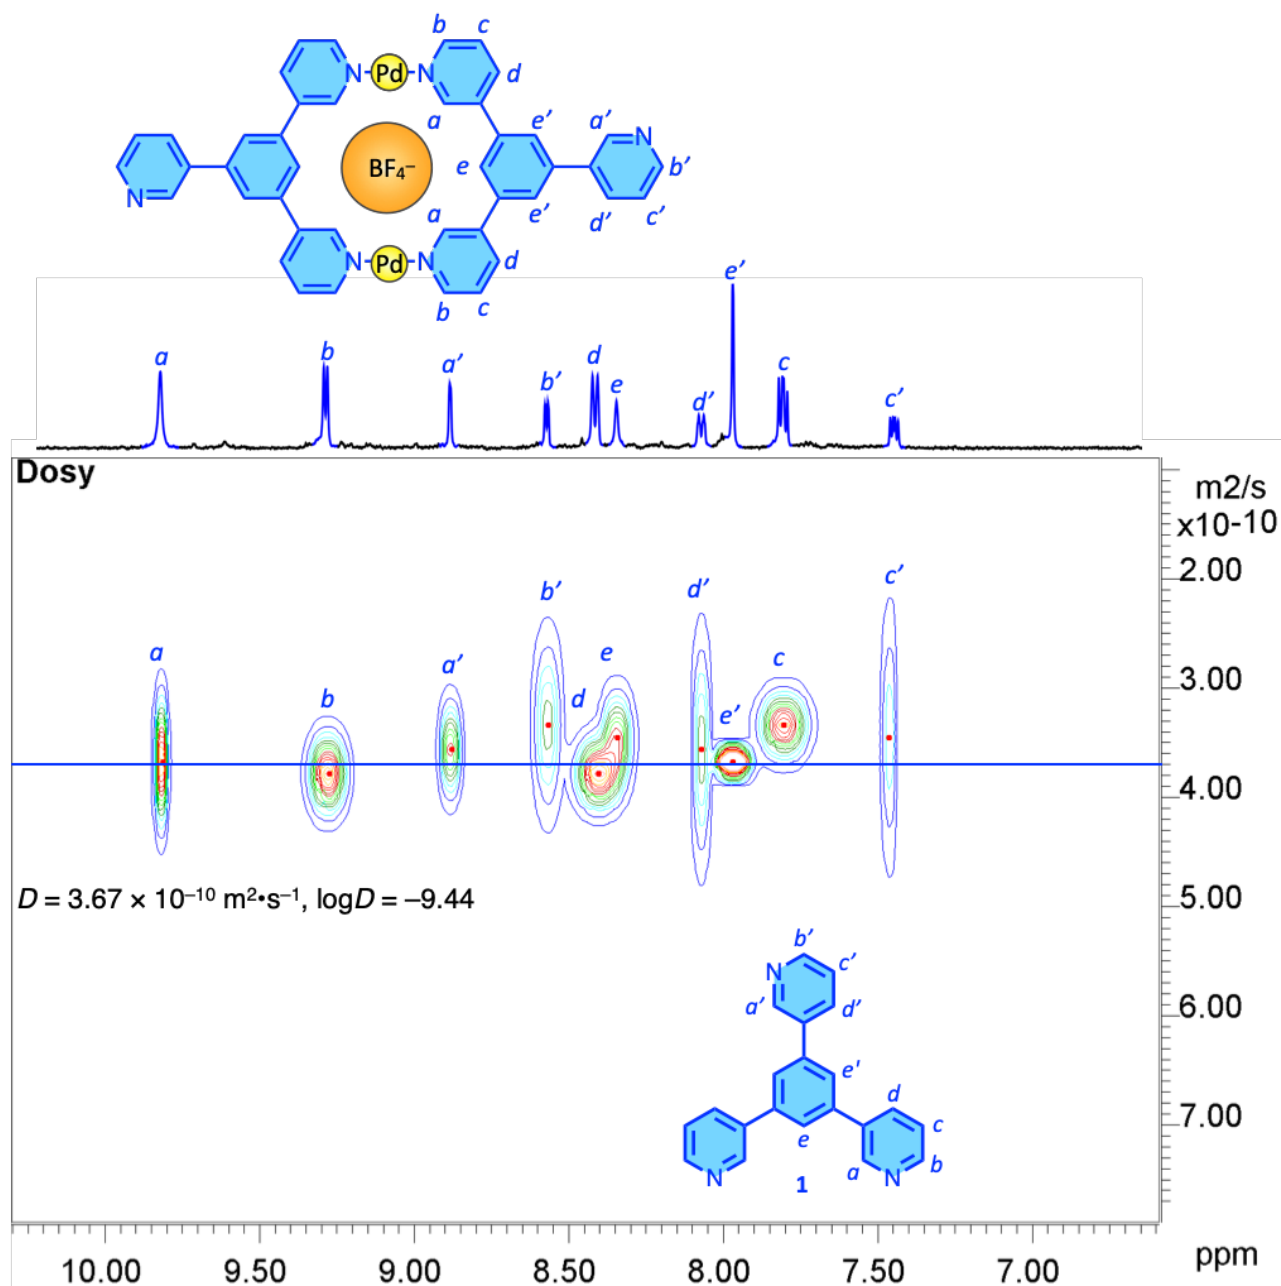

**Figure S4.**  $^1\text{H}$  DOSY NMR spectrum (500 MHz,  $\text{CD}_3\text{NO}_2$ , 298 K, aromatic region) of  $(\text{BF}_4^-)\text{C}[\text{Pd}_2\mathbf{1}_2]^{4+}$  in  $\text{CD}_3\text{NO}_2$  at 298 K measured after convergence. The signals colored blue indicate  $(\text{BF}_4^-)\text{C}[\text{Pd}_2\mathbf{1}_2]^{4+}$ . The pyridyl rings including  $\text{H}^a\text{--H}^d$  are engaged in coordinating to a  $\text{Pd}(\text{II})$  ion, while that including  $\text{H}^{a'}\text{--H}^{d'}$  does not coordinate to a  $\text{Pd}(\text{II})$  ion.

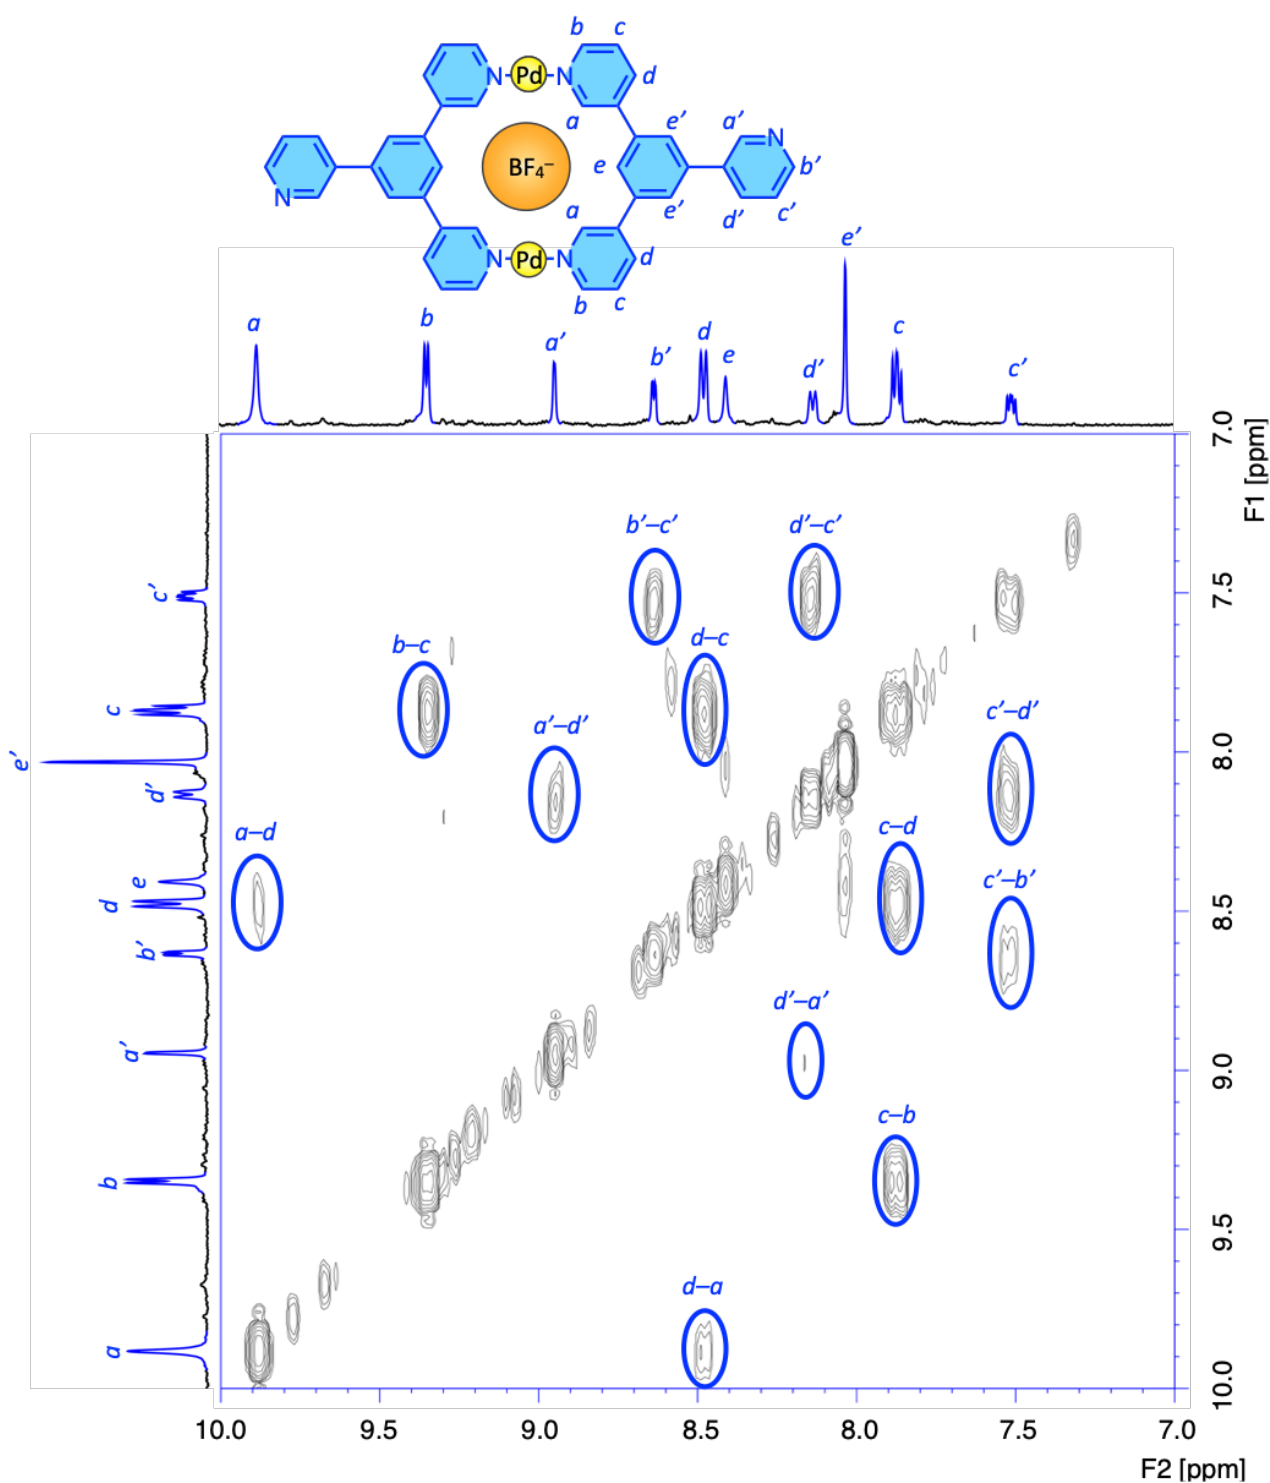

**Figure S5.** (H,H)-COSY NMR spectrum (500 MHz,  $\text{CD}_3\text{NO}_2$ , 298 K, aromatic region) of  $(\text{BF}_4^-)\text{C}[\text{Pd}_2\mathbf{1}_2]^{4+}$  in  $\text{CD}_3\text{NO}_2$  at 298 K measured after convergence. The signals colored blue indicate  $(\text{BF}_4^-)\text{C}[\text{Pd}_2\mathbf{1}_2]^{4+}$ . The pyridyl rings including  $\text{H}^a\text{--H}^d$  are engaged in coordinating to a  $\text{Pd}(\text{II})$  ion, while that including  $\text{H}^{a'}\text{--H}^{d'}$  does not coordinate to a  $\text{Pd}(\text{II})$  ion.

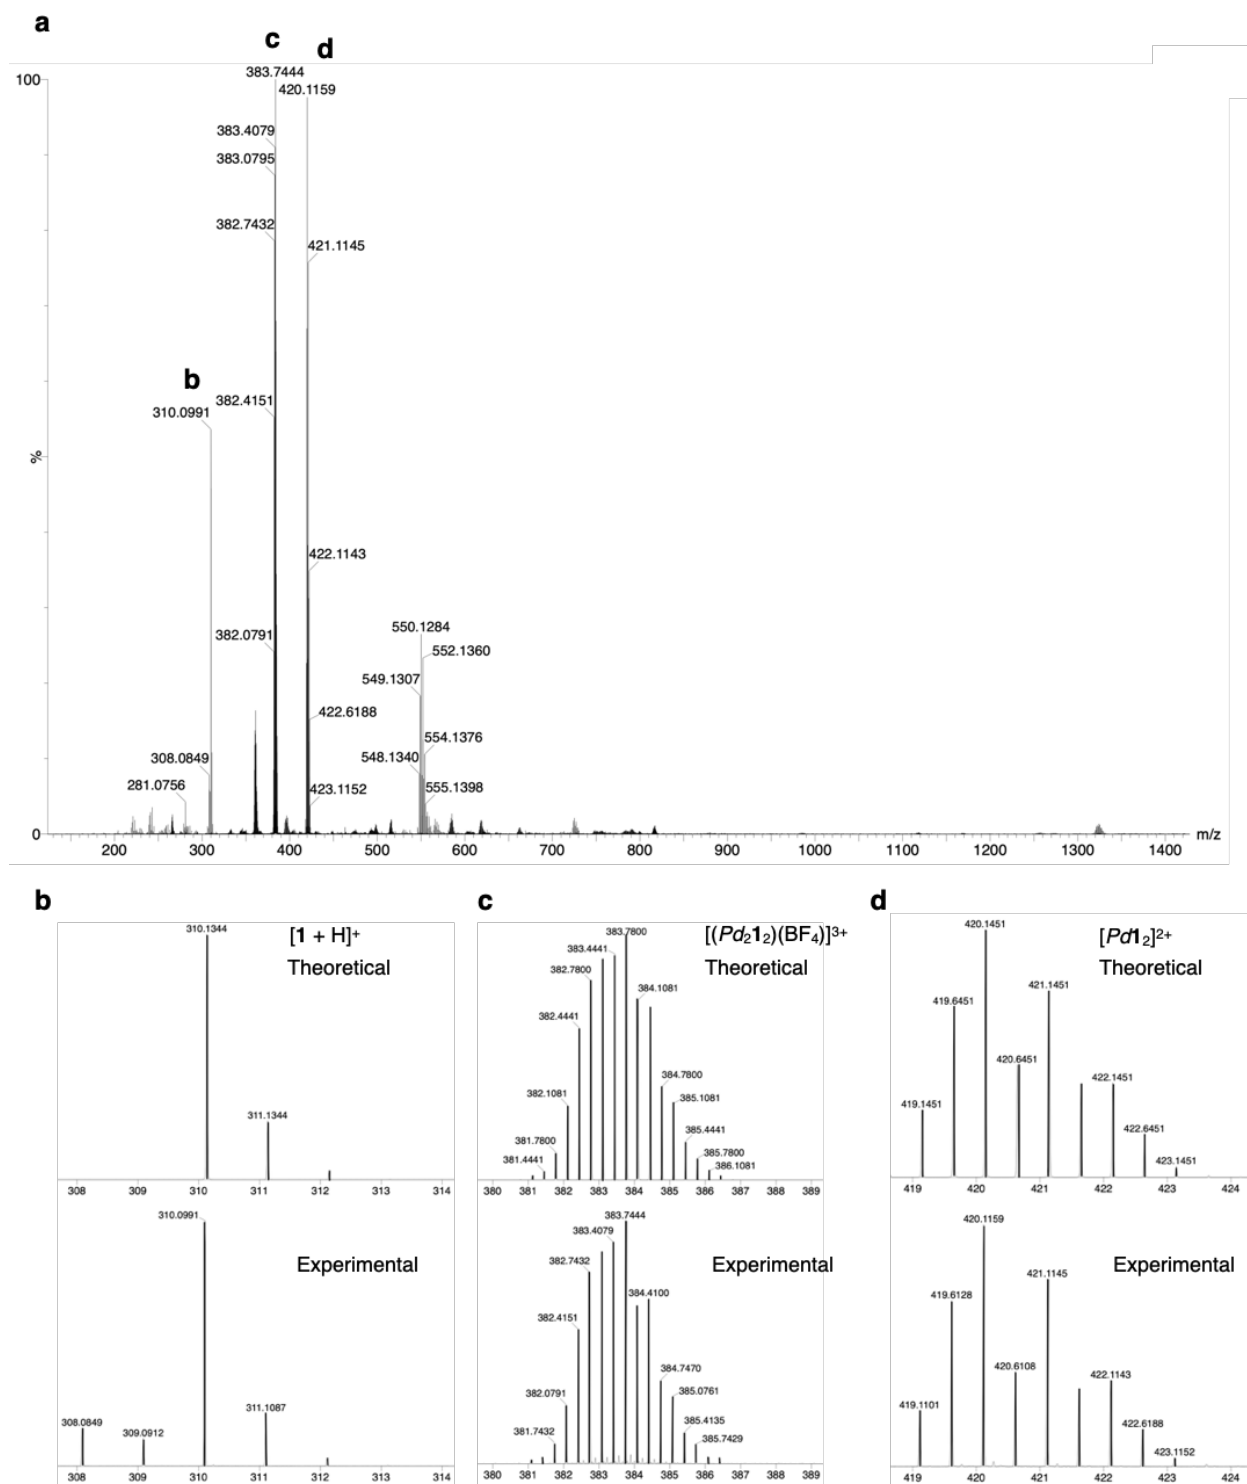

**Figure S6.** ESI-TOF mass spectrum of the reaction mixture for the self-assembly of  $(BF_4)^- [Pd_21_2]^{4+}$  from  $[PdPy^*_2](BF_4)_2$  and **1** in  $CD_3NO_2$  at 298 K measured after convergence. (a): overall spectrum, (b)–(d): expanded spectra.

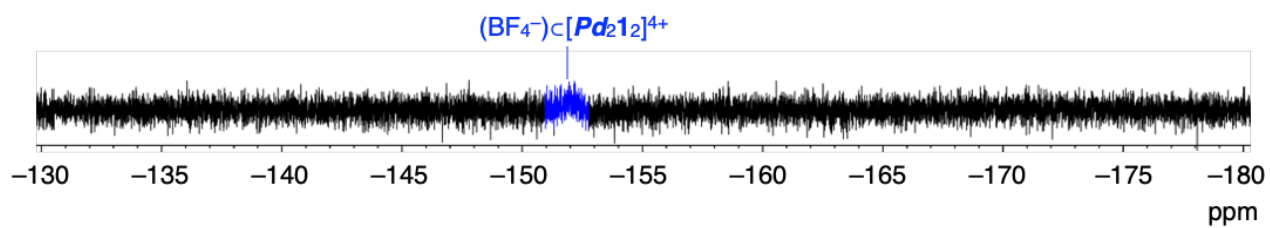

**Figure S7.** Partial  $^{19}\text{F}$  NMR spectrum (500 MHz,  $\text{CD}_3\text{NO}_2$ , 298 K) of  $(\text{BF}_4^-)\text{C}[\text{Pd}_2\mathbf{1}_2]^{4+}$  in  $\text{CD}_3\text{NO}_2$  measured after convergence. The signal colored in blue indicates  $(\text{BF}_4^-)\text{C}[\text{Pd}_2\mathbf{1}_2]^{4+}$ .

# Determination of the equilibrium constants between $\text{NO}_3^-$ and the $[\text{Pd}_3\mathbf{1}_2]^{6+}$ cage

(a)

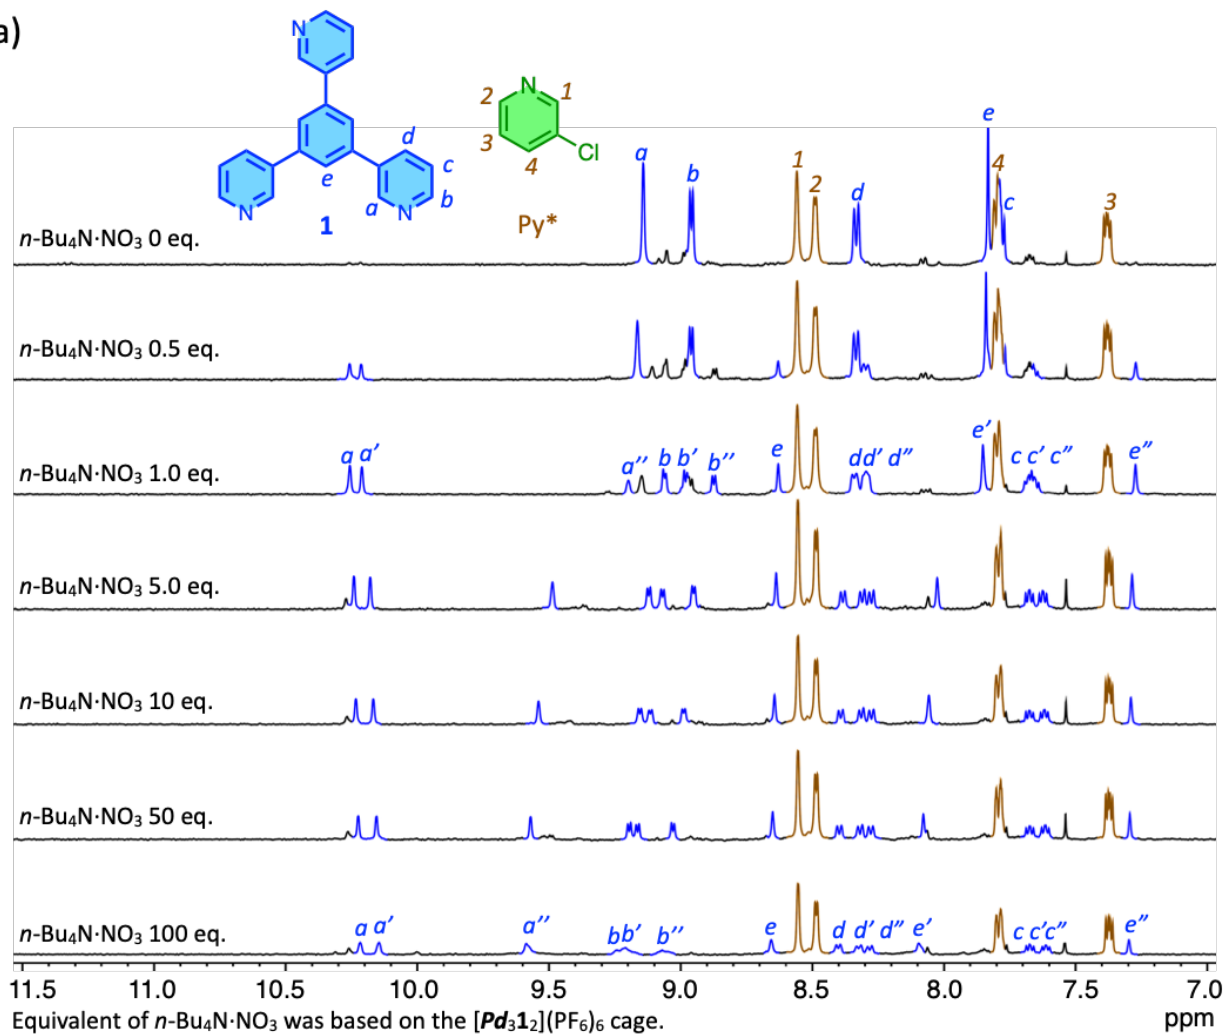

(b)

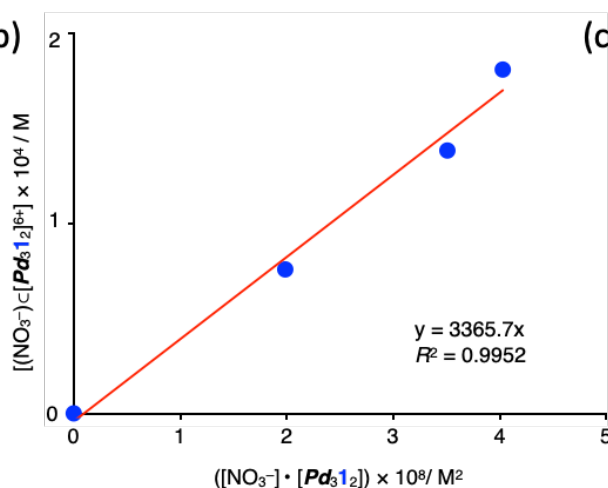

(c)

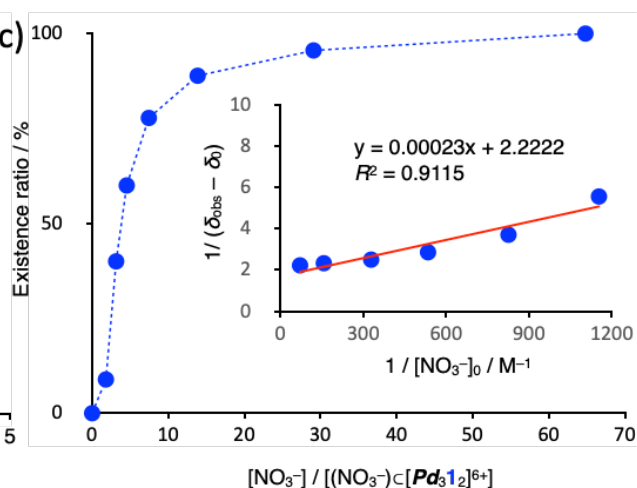

**Figure S8.** (a) Selected  $^1\text{H}$  NMR spectra (500 MHz,  $\text{CD}_3\text{NO}_2$ , 298 K, aromatic region,  $[\mathbf{1}]_0 = 0.67$  mM,  $[\text{PdPy}_2^*(\text{PF}_6)_2] = 1.0$  mM) of the titration experiment of the  $[\text{Pd}_3\mathbf{1}_2](\text{PF}_6)_6$  cage with  $n\text{-Bu}_4\text{N}\cdot\text{NO}_3$ . Binding isotherm to determine (b) the first and (c) the second equilibrium constants between  $\text{NO}_3^-$  and the  $[\text{Pd}_3\mathbf{1}_2]$  cage.

# Characterization of the $[Pd_32_2]^{6+}$ cage

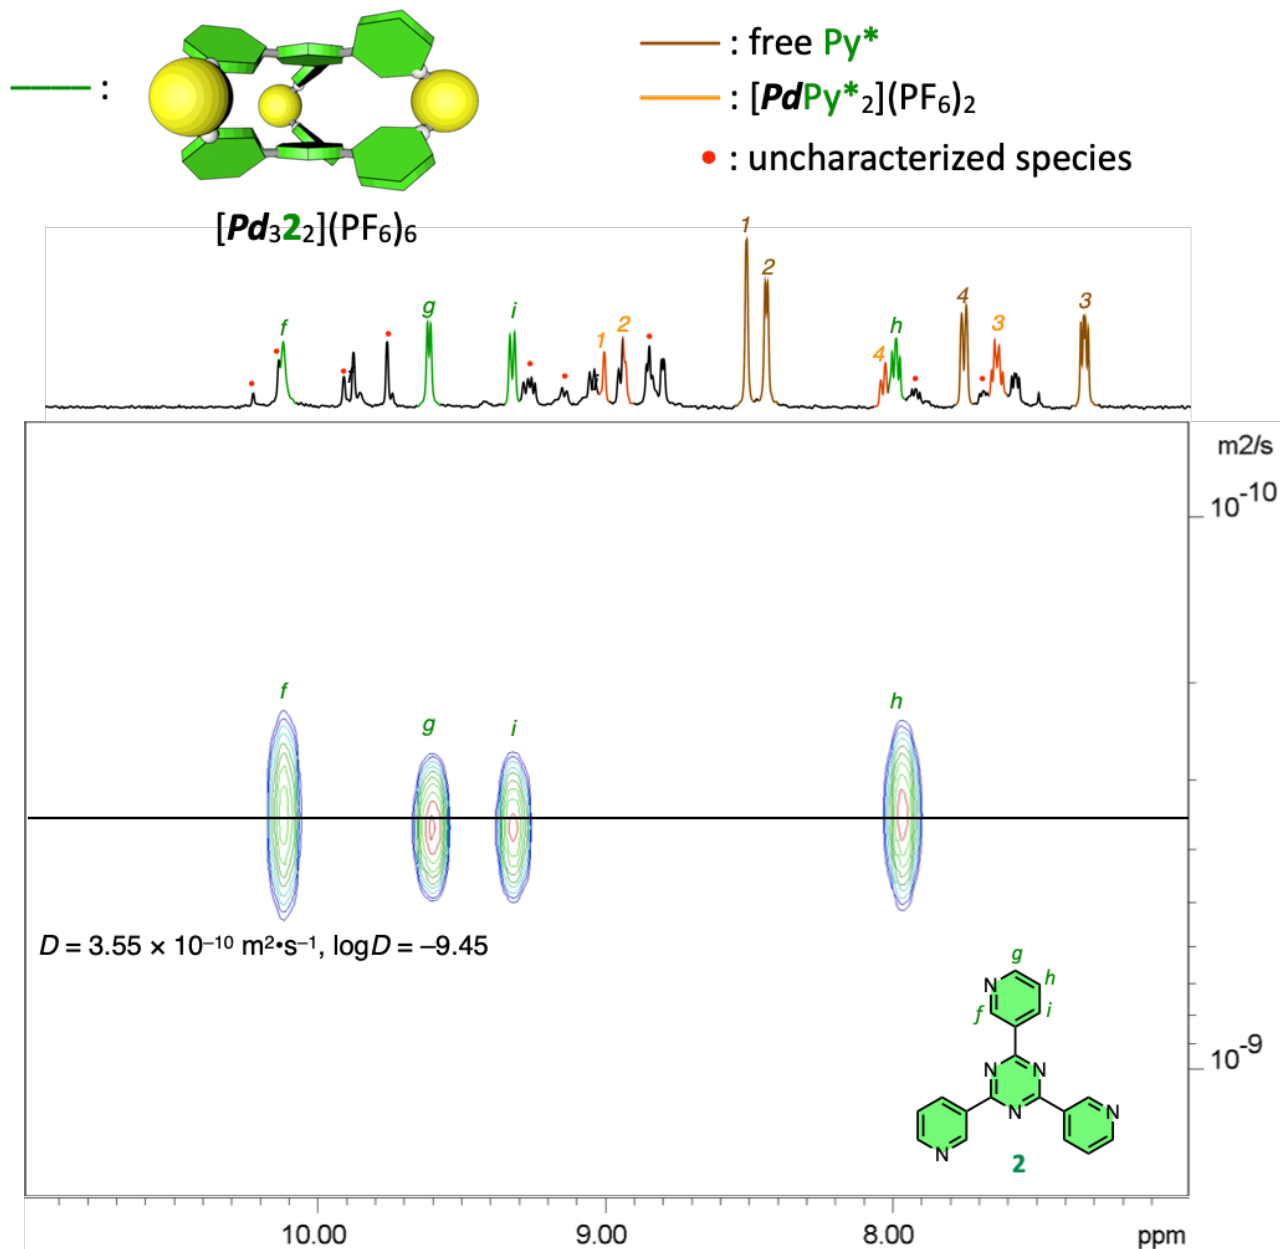

**Figure S9.**  $^1H$  DOSY NMR spectrum (500 MHz,  $CD_3NO_2$ , 298 K, aromatic region) of the reaction mixture for the self-assembly of the  $[Pd_32_2](PF_6)_6$  cage from  $[PdPy^*_2](PF_6)_2$  and **2** ( $[Pd]_0 = 0.82 \text{ mM}$  and  $[2]_0 = 0.82 \text{ mM}$ ) in  $CD_3NO_2$  at 298 K measured after convergence. The signals colored green, brown, and orange indicate the  $[Pd_32_2](PF_6)_6$  cage,  $Py^*$ , and  $[PdPy^*_2](PF_6)_2$ , respectively. The signals marked in red solid circle indicate the uncharacterized species.

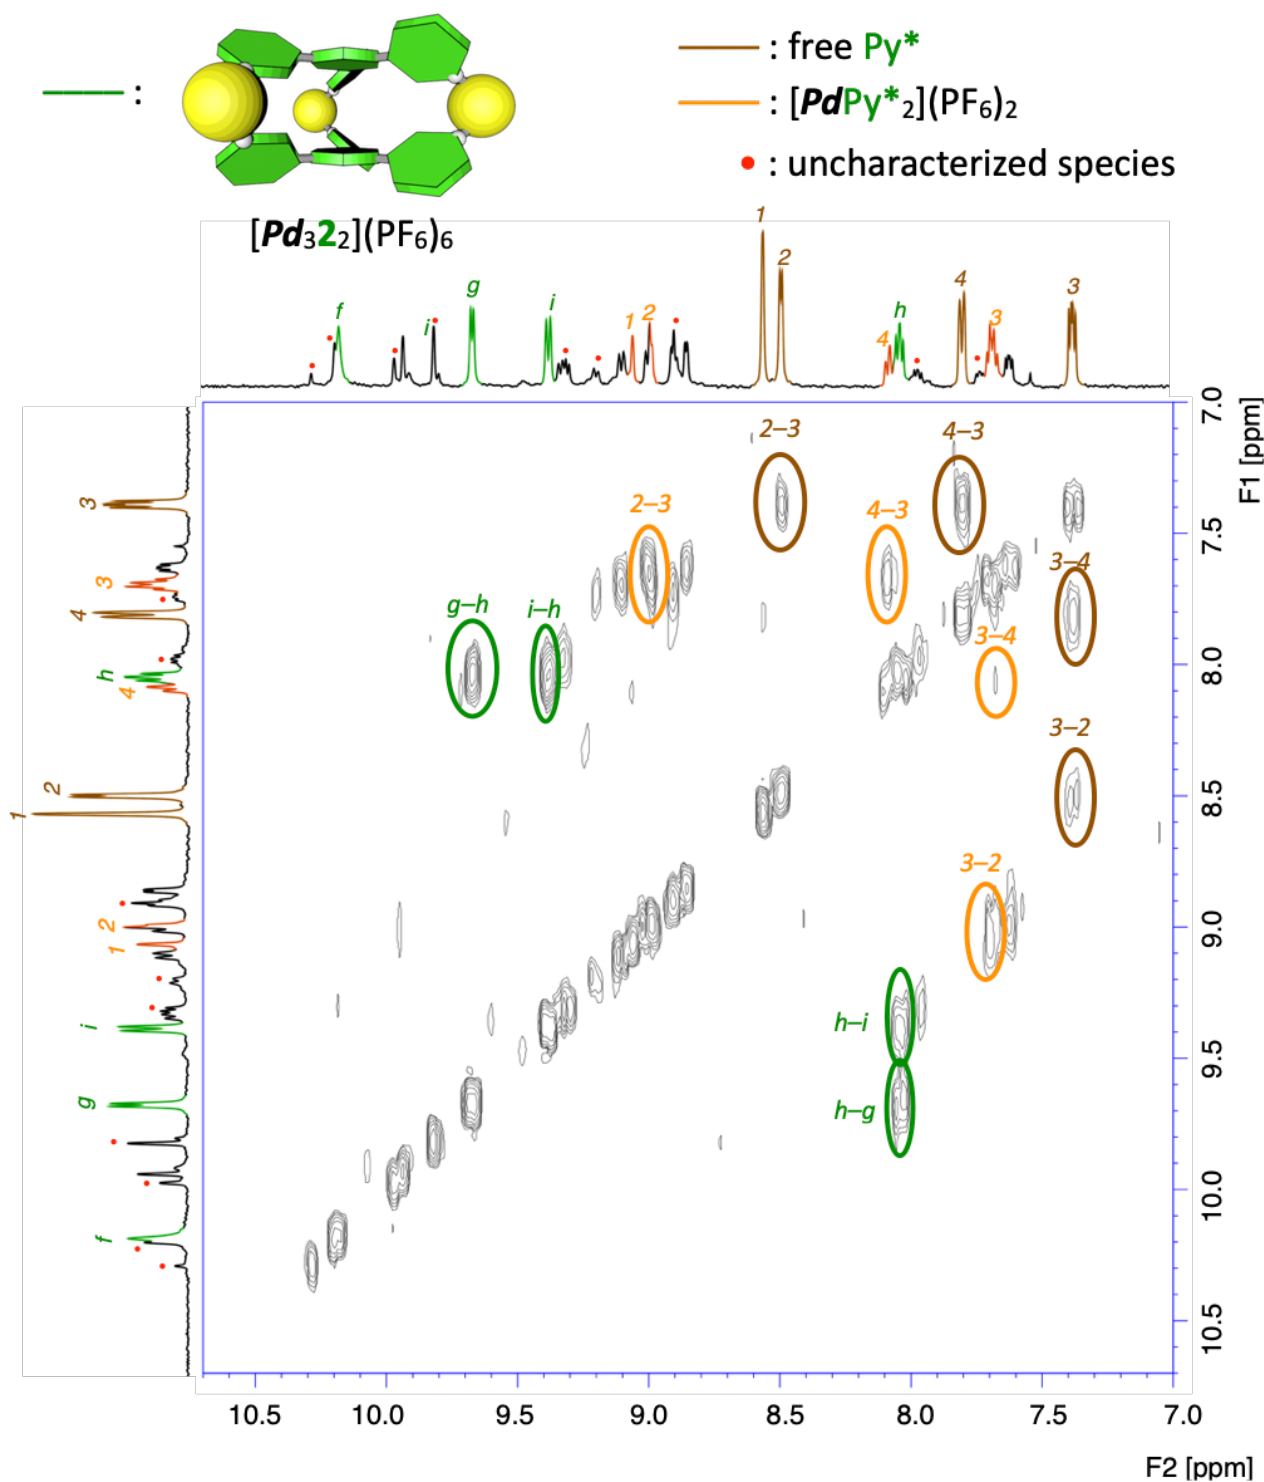

**Figure S10.** (H,H)-COSY NMR spectrum (500 MHz,  $CD_3NO_2$ , 298 K, aromatic region) of the reaction mixture for the self-assembly of the  $[Pd_32_2](PF_6)_6$  cage from  $[PdPy^*_2](PF_6)_2$  and **2** ( $[Pd]_0 = 0.82$  mM and  $[2]_0 = 0.82$  mM) in  $CD_3NO_2$  at 298 K measured after convergence. The signals colored green, brown, and orange indicate the  $[Pd_32_2](PF_6)_6$  cage,  $Py^*$ , and  $[PdPy^*_2](PF_6)_2$ , respectively. The signals marked in red solid circle indicate the uncharacterized species.

Assignment of the  $^1\text{H}$  NMR spectra of  $(\text{X}^-)\text{C}[\text{Pd}_2\mathbf{2}_2]^{4+}$

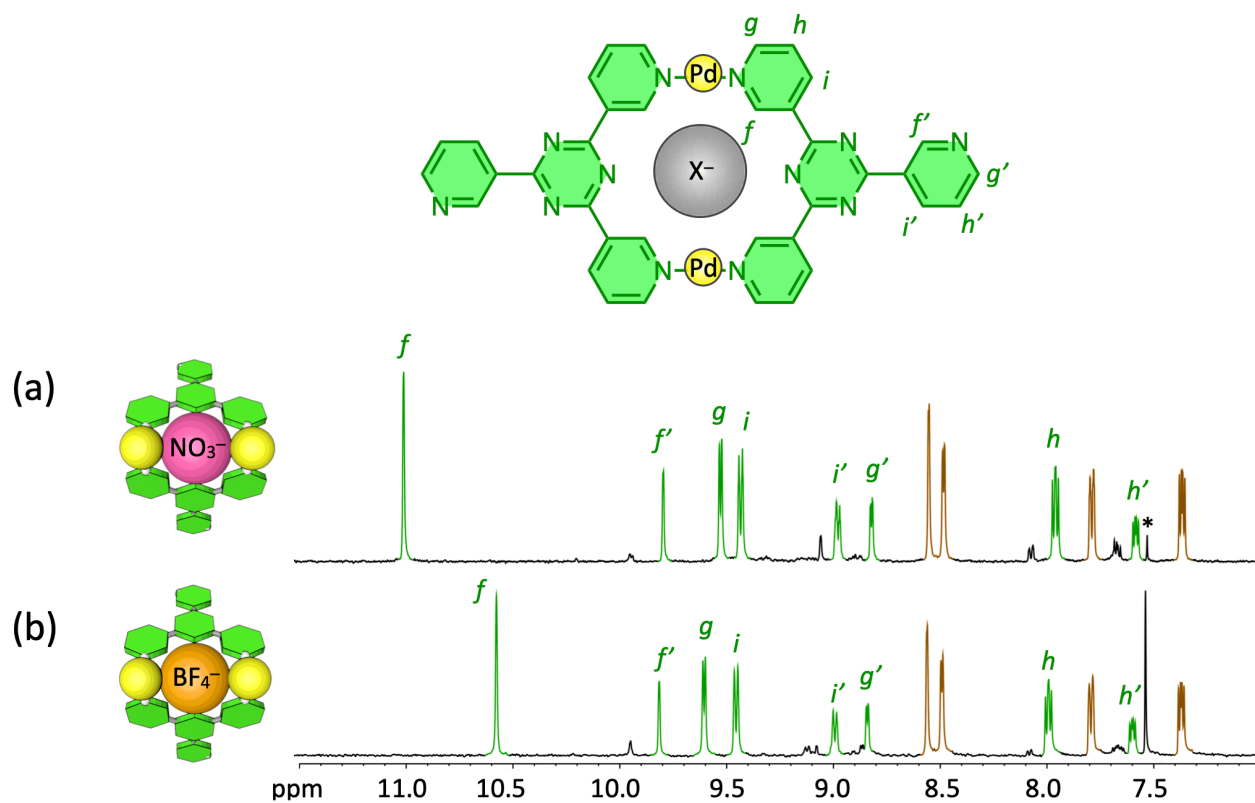

**Figure S11.**  $^1\text{H}$  NMR spectra of (a)  $(\text{NO}_3^-)\text{C}[\text{Pd}_2\mathbf{2}_2]^{4+}$  and (b)  $(\text{BF}_4^-)\text{C}[\text{Pd}_2\mathbf{2}_2]^{4+}$  with their assignments.



<sup>1</sup>H NMR spectra of the self-sorting experiments

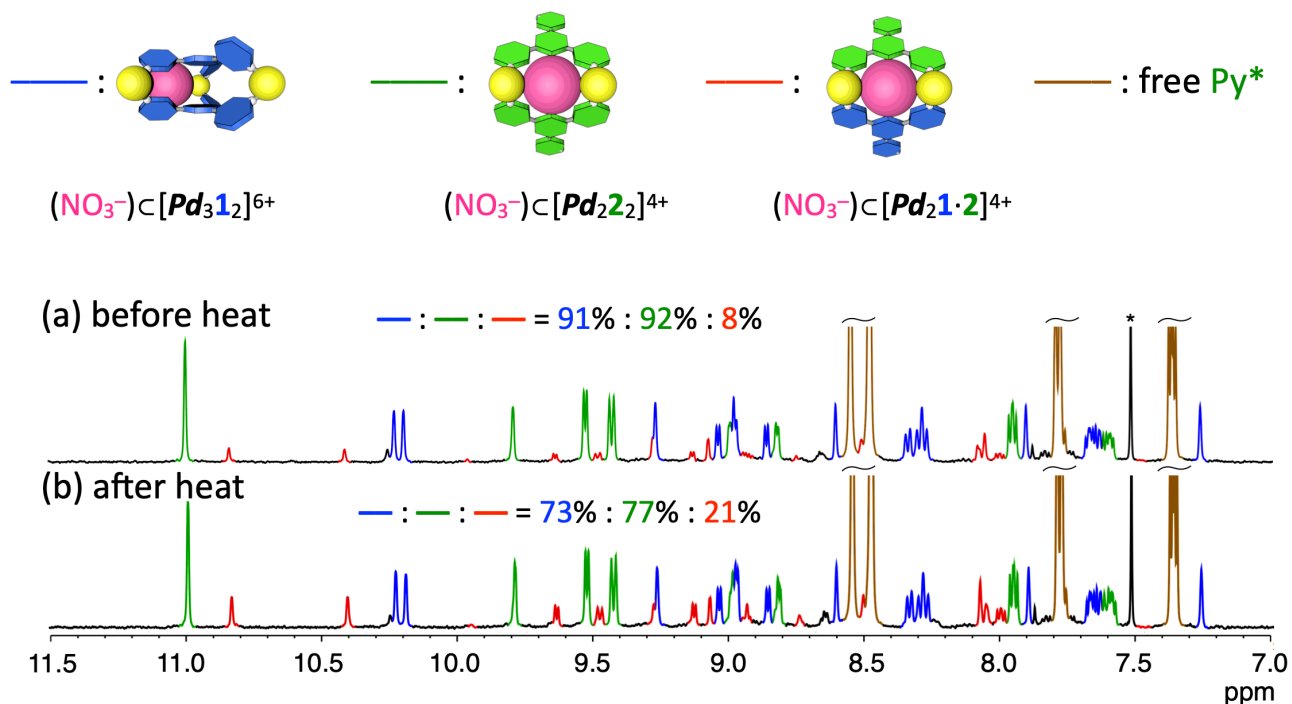

**Figure S12.** <sup>1</sup>H NMR spectra (500 MHz,  $\text{CD}_3\text{NO}_2:\text{CDCl}_3 = 11:1$  (v/v), 298 K, aromatic region,  $[\mathbf{1}]_0 = [\mathbf{2}]_0 = 0.67$  mM,  $[\text{PdPy}^*_2(\text{PF}_6)_2] = 1.0$  mM) of the self-sorting experiments of (a) state III and (b) state II generated from state III by heating to reach equilibrium.

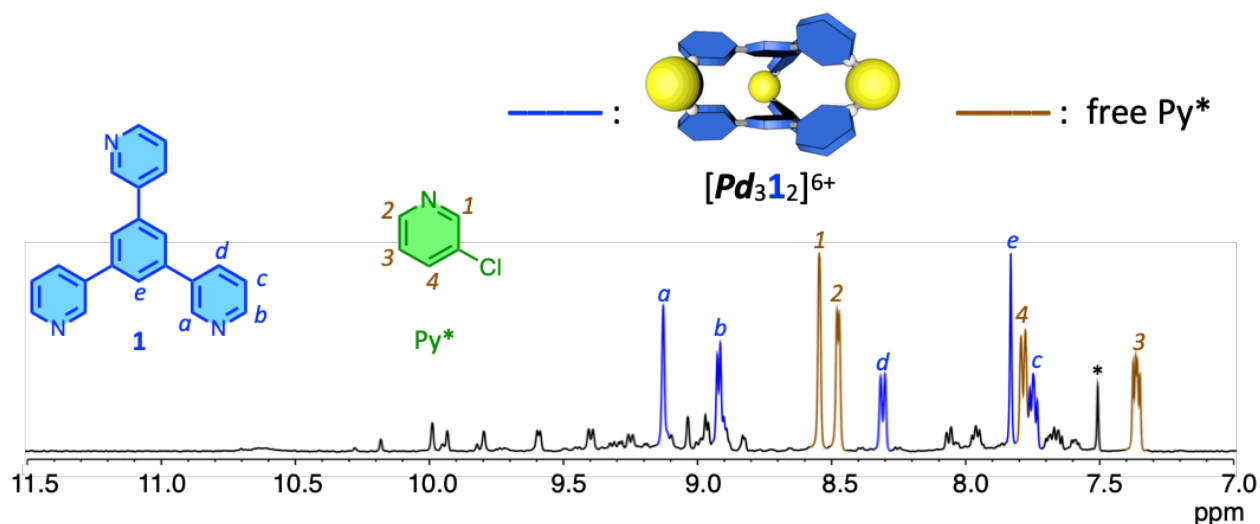

**Figure S13.** <sup>1</sup>H NMR spectrum (500 MHz,  $\text{CD}_3\text{NO}_2:\text{CDCl}_3 = 11:1$  (v/v), 298 K, aromatic region,  $[\mathbf{1}]_0 = [\mathbf{2}]_0 = 0.67$  mM,  $[\text{PdPy}^*_2(\text{PF}_6)_2] = 1.0$  mM) of the reaction mixture of **1**, **2**, and  $[\text{PdPy}^*_2](\text{PF}_6)_2$  at 363 K. Signals in blue and brown are assigned to the  $[\text{Pd}_3\mathbf{1}_2](\text{PF}_6)_6$  cage and free  $\text{Py}^*$ , respectively.

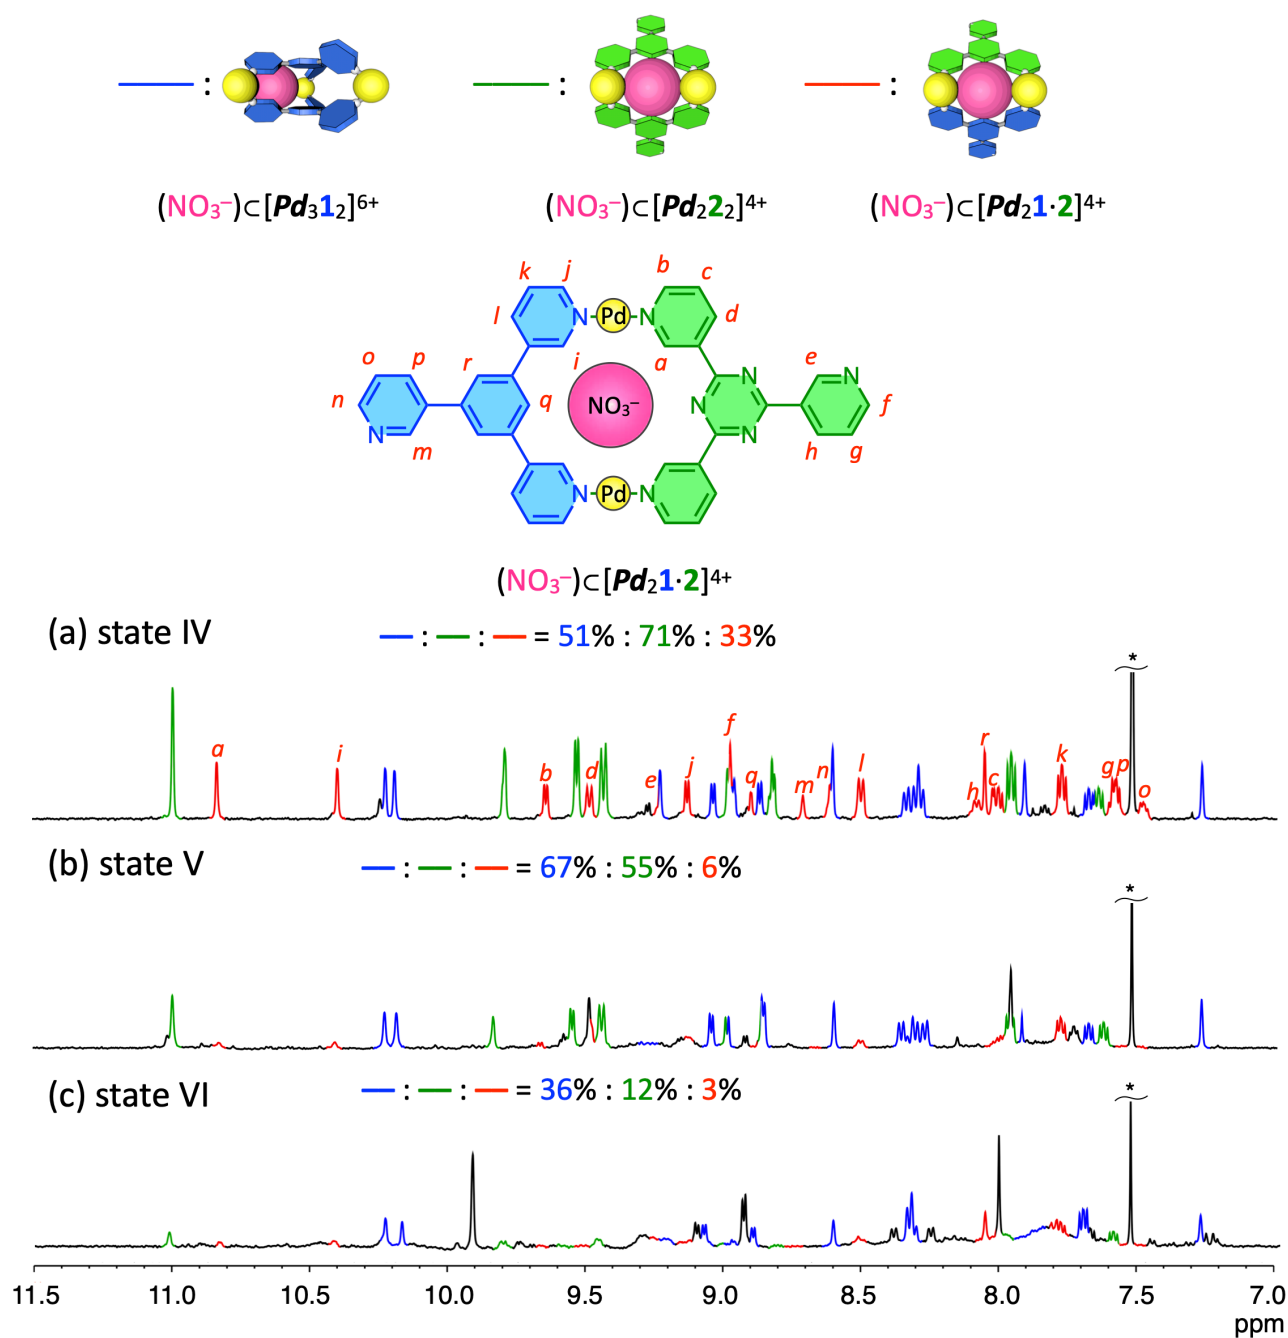

**Figure S14.**  $^1\text{H}$  NMR spectra (500 MHz,  $\text{CD}_3\text{NO}_2:\text{CDCl}_3$  (11:1 (v/v)), 298 K, aromatic region) of the self-sorting experiments depending on the pathway using  $\text{CH}_3\text{CN}$  as a leaving ligand. (a) state IV generated at 298 K by initially adding  $\text{NO}_3^-$ . The assignment of the signals of  $(\text{NO}_3^-)\text{C}[\text{Pd}_2\mathbf{1}\cdot\mathbf{2}]^{4+}$  is indicated by red characters. (b) state V generated from states IV and VI by heating to reach equilibrium. (c) state VI generated at 363 K without  $\text{NO}_3^-$ , following that  $\text{NO}_3^-$  was added at 298 K. The assignment of the signals for  $(\text{NO}_3^-)\text{C}[\text{Pd}_3\mathbf{1}_2]^{6+}$  and  $(\text{NO}_3^-)\text{C}[\text{Pd}_2\mathbf{2}_2]^{4+}$  are shown in Figures S2 and S11a, respectively. Asterisk indicates  $\text{CHCl}_3$ .

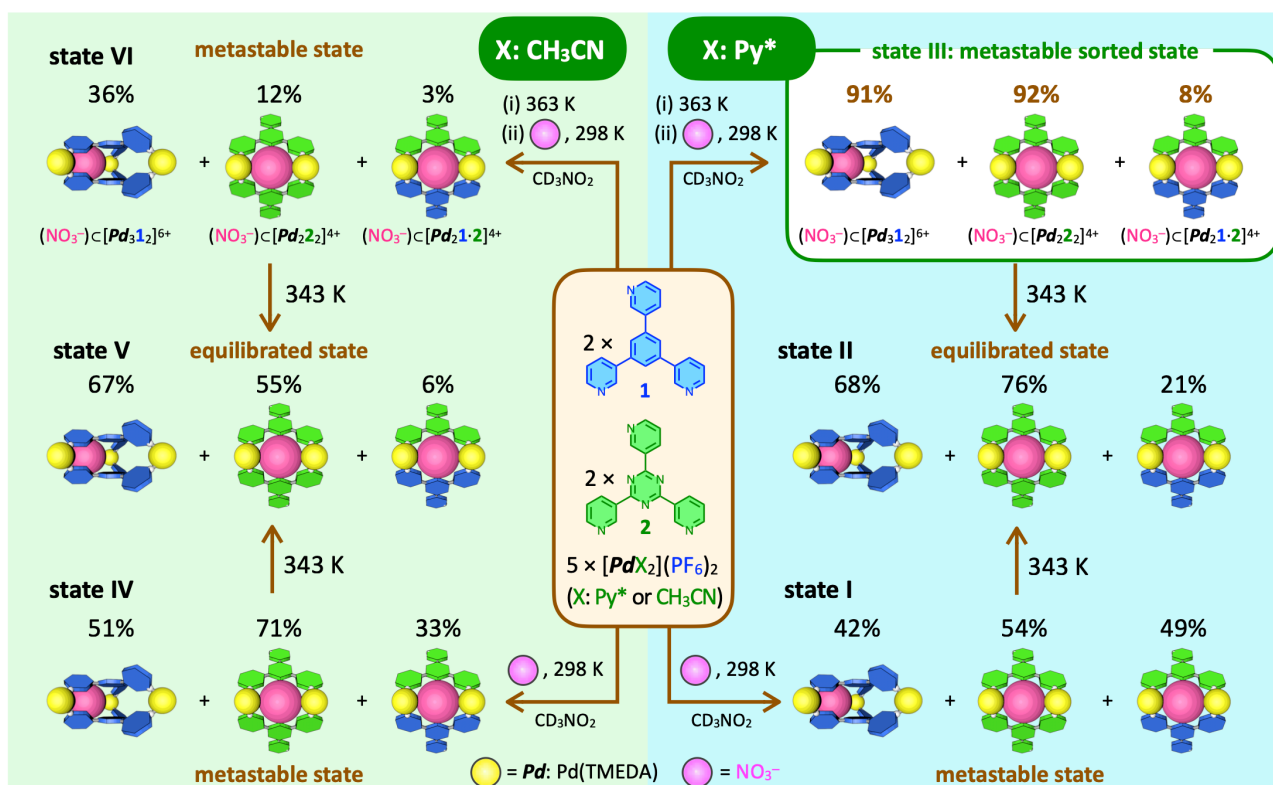

**Figure S15.** A summary of the self-sorting experiments of the tritopic ligands **1** and **2** with  $[\text{PdX}_2](\text{PF}_6)_2$  in  $\text{CD}_3\text{NO}_2$ .

## References

1. R. Lavendomme, T. K. Ronson and J. R. Nitschke, *J. Am. Chem. Soc.* 2019, **141**, 12147–12158.
2. H. L. Anderson, S. Anderson and J. K. M. Sanders, *J. Chem. Soc. Perkin Trans. 1* 1995, 2231–2245.
3. K. Uehara, T. Oishi, T. Hirose and N. Mizuno, *Inorg. Chem.* 2013, **52**, 11200–11209.
4. F. Proutiere, E. Lyngvi, M. Aufiero, I. A. Sanhueza and F. Schoenebeck, *Organometallics* 2014, **33**, 6879–6884.
5. G. M. Sheldrick, *Acta Crystallogr. Sect. A* 2015, **71**, 3–8.
6. G. M. Sheldrick, *Acta Crystallogr. Sect. C* 2015, **71**, 3–8.
7. O. V. Dolomanov, L. J. Bourhis, R. J. Gildea, J. A. K. Howard and H. Puschmann, *J. Appl. Crystallogr.* 2009, **42**, 339–341.
8. C. B. Hübschle, G. M. Sheldrick, B. Dittrich, *ShelXle: a Qt graphical user interface for SHELXL*. *J. Appl. Cryst.* 2011, **44**, 1281–1284.
9. A. L. Spek, *Acta Crystallogr. Sect. D* 2009, **65**, 148–155.
